- function of medial and lateral human Brodmann area 6. *J Neurosci* 2005; 25:496–501
36. Apkarian AV: Human Brain Imaging Studies of Chronic Pain: Translational Pain Research: From Mouse to Man. Boca Raton, FL, CRC Press; 2010
  37. Ness TJ, San Pedro EC, Richards JS, Kezar L, Liu HG, Mountz JM: A case of spinal cord injury-related pain with baseline rCBF brain SPECT imaging and beneficial response to gabapentin. *Pain* 1998; 78:139–43
  38. Coghill RC, McHaffie JG, Yen YF: Neural correlates of inter-individual differences in the subjective experience of pain. *Proc Natl Acad Sci U S A* 2003; 100:8538–42
  39. Caspers S, Geyer S, Schleicher A, Mohlberg H, Amunts K, Zilles K: The human inferior parietal cortex: Cytoarchitectonic parcellation and interindividual variability. *Neuroimage* 2006; 33:430–48
  40. Caspers S, Eickhoff SB, Geyer S, Scheperjans F, Mohlberg H, Zilles K, Amunts K: The human inferior parietal lobule in stereotaxic space. *Brain Struct Funct* 2008; 212:481–95
  41. Amunts K, Kedo O, Kindler M, Pieperhoff P, Mohlberg H, Shah NJ, Habel U, Schneider F, Zilles K: Cytoarchitectonic mapping of the human amygdala, hippocampal region and entorhinal cortex: Intersubject variability and probability maps. *Anat Embryol (Berl)* 2005; 210:343–52

## ANESTHESIOLOGY REFLECTIONS FROM THE WOOD LIBRARY-MUSEUM

### A Dental Anesthetic for Tolerating a Stranger in the Dark?

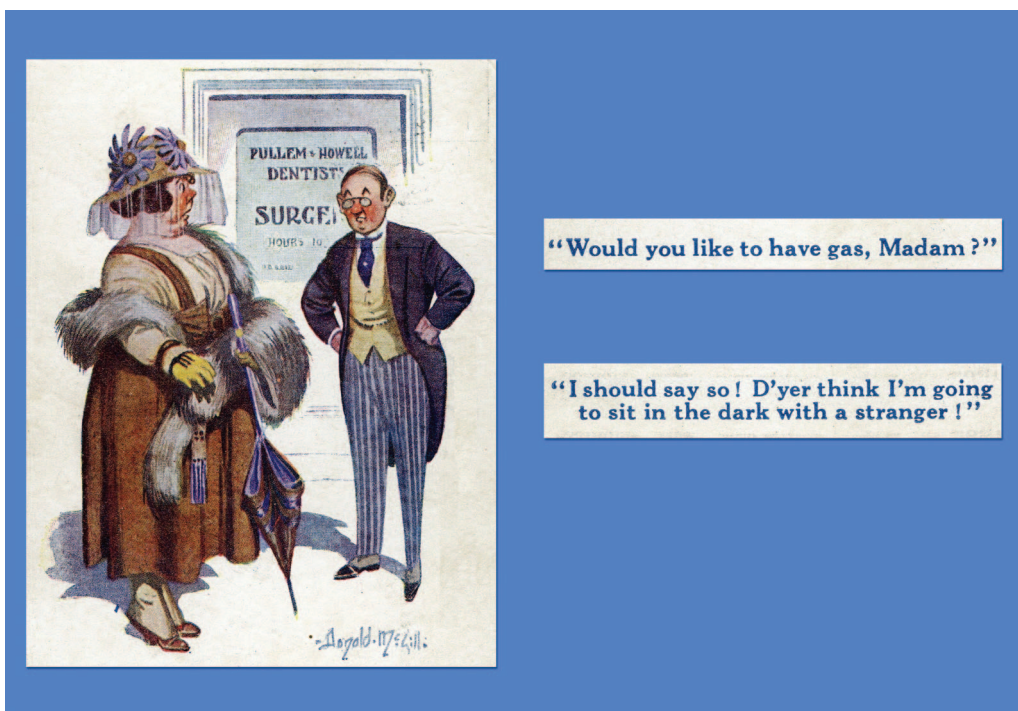

“Would you like to have gas, Madam?”

“I should say so! D’yer think I’m going to sit in the dark with a stranger!”

About 9 months after the end of World War I, a visitor to the English seaside affixed a red one-penny King George V stamp to a mailing illustrated by “the king of the saucy postcard,” Donald McGill (1875–1962). After canceling the stamp on August 20, 1919, the Royal Mail managed to deliver the postcard without postmarking McGill’s artwork (*left*), which featured an overdressed woman outside the surgery of “Pullem & Howell, Dentists.” She is portrayed as insisting on receiving nitrous oxide in order to tolerate sitting “in the dark with a stranger” (*right*). McGill has apparently identified yet another use for laughing gas . . . (Copyright © the American Society of Anesthesiologists, Inc.)

George S. Bause, M.D., M.P.H., Honorary Curator, ASA’s Wood Library-Museum of Anesthesiology, Park Ridge, Illinois, and Clinical Associate Professor, Case Western Reserve University, Cleveland, Ohio. [UJYC@aol.com](mailto:UJYC@aol.com).
